# Supplementary material for: Genomic Landscape of Primary Mediastinal B-Cell Lymphoma Cell Lines
Source: PubMed Central journal article supplement (PMC4657880; doi:10.1371/journal.pone.0139663), 2015-11-23

Chromosome 1

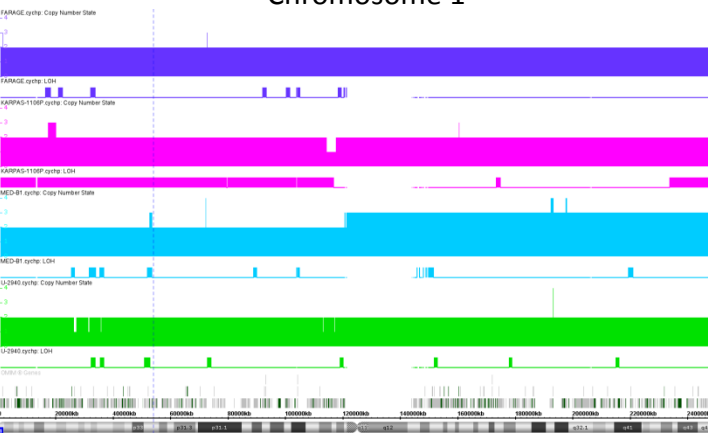

Chromosome 2

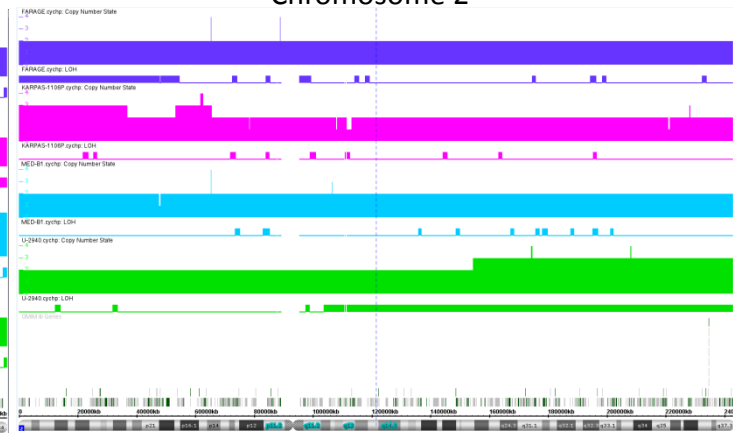

Chromosome 3

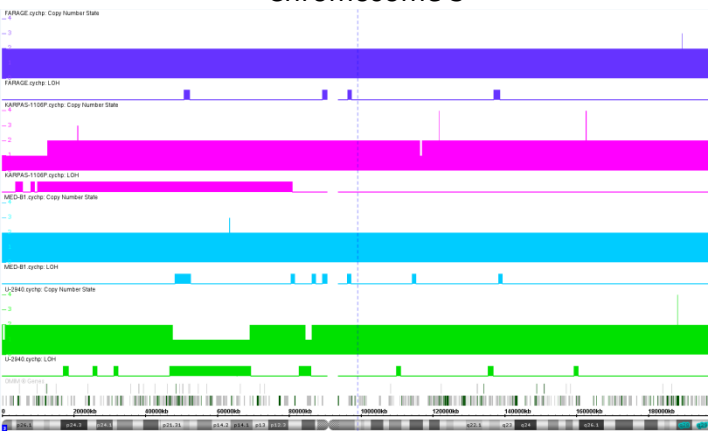

Chromosome 4

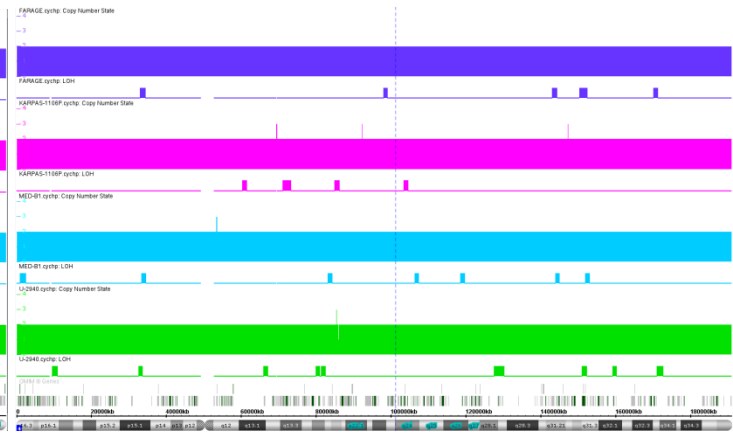

Chromosome 5

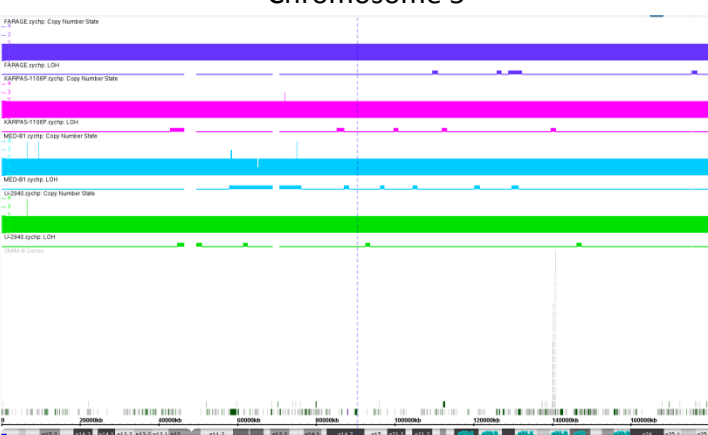

Chromosome 6

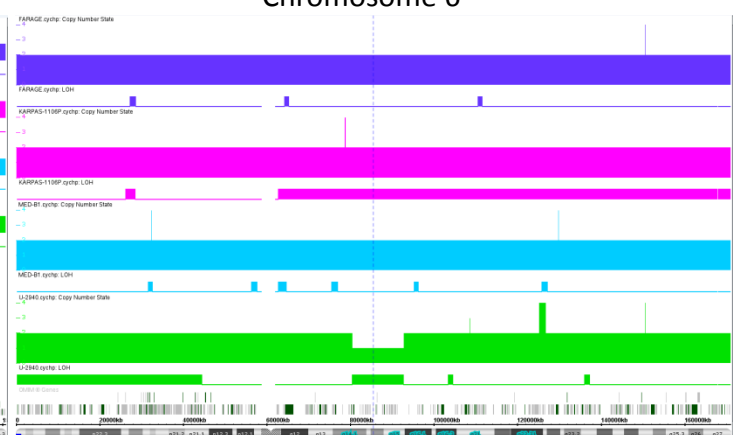

Chromosome 7

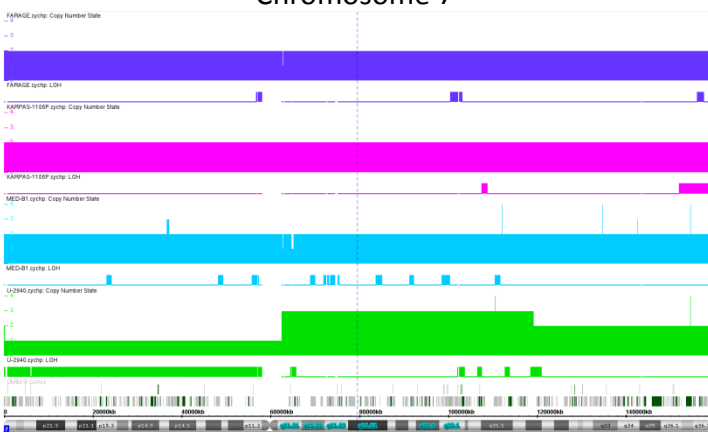

Chromosome 8

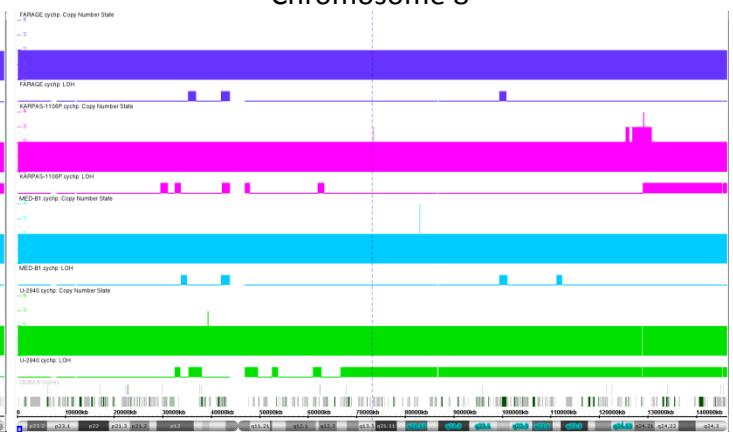



## Chromosome 17

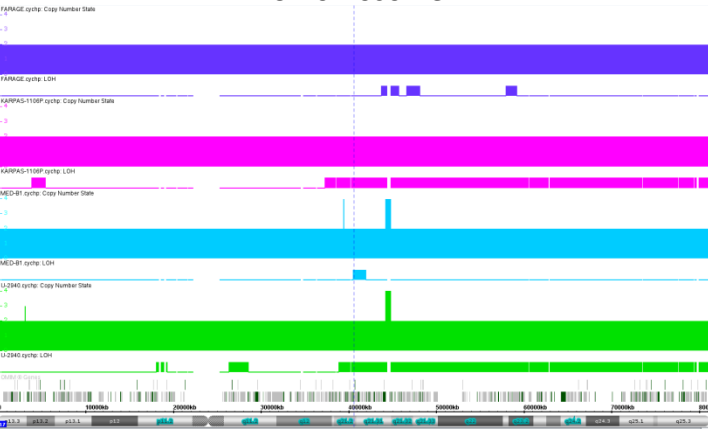

## Chromosome 18

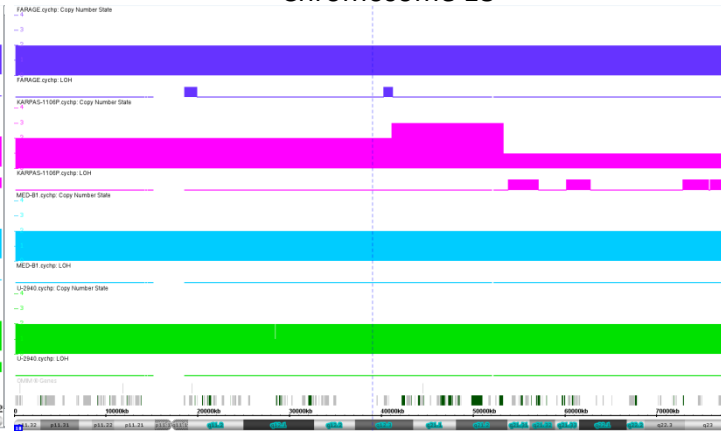

## Chromosome 19

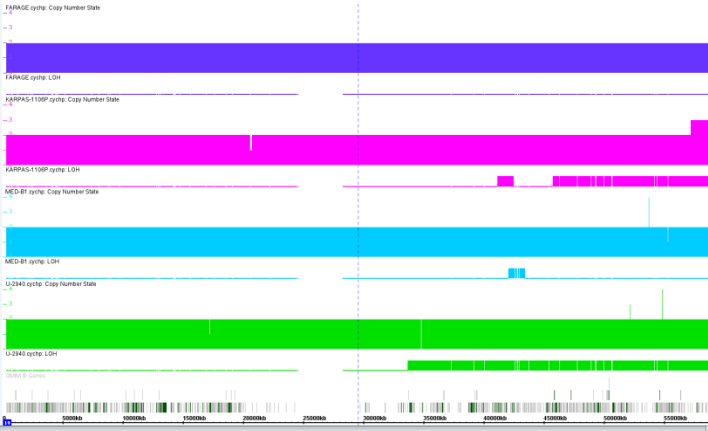

## Chromosome 20

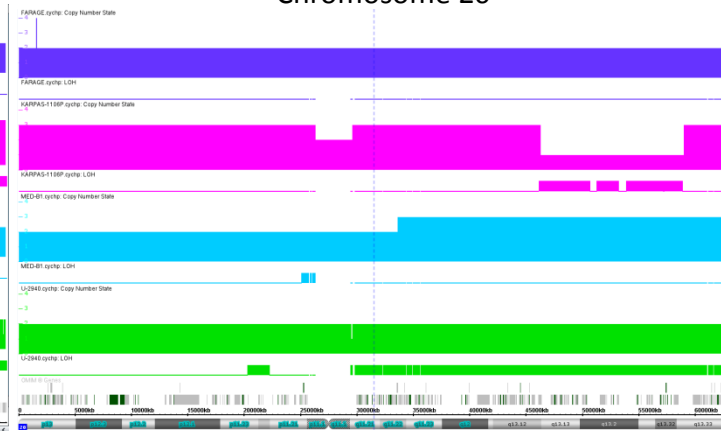

## Chromosome 21

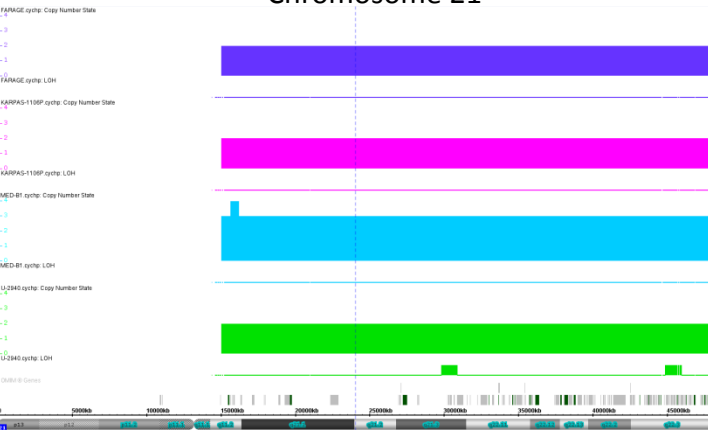

## Chromosome 22

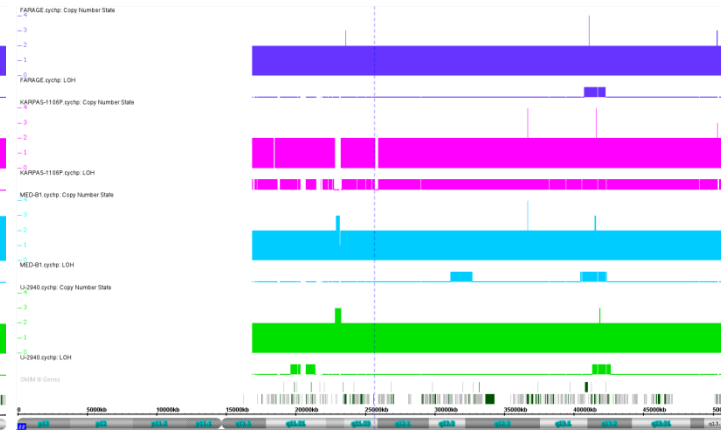

## Chromosome X

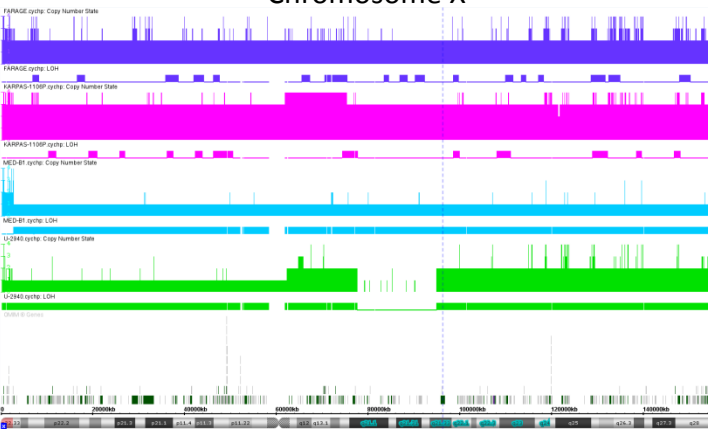

## Chromosome Y

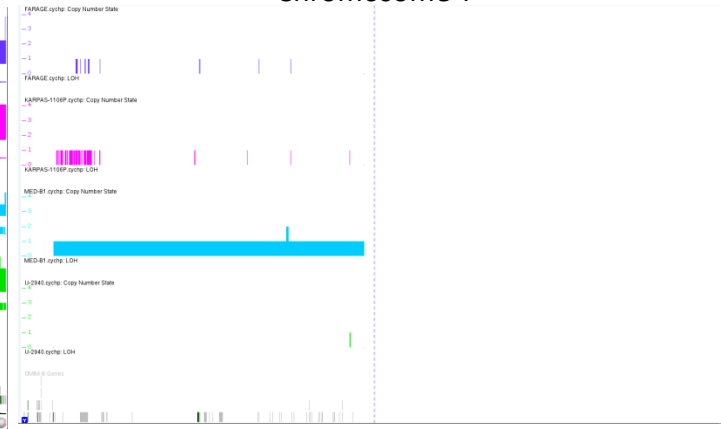

Supplement: pone.0139663.s003.pdf [file pone.0139663.s003.pdf]
