# Supplementary material for: Genomic Landscape of Primary Mediastinal B-Cell Lymphoma Cell Lines
Source: PubMed Central journal article supplement (PMC4657880; doi:10.1371/journal.pone.0139663), 2015-11-23

GSE40160 / GPL570 / 205173\_x\_at

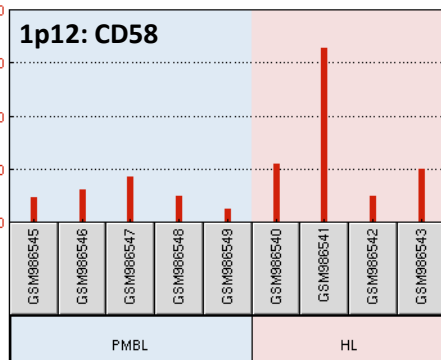

GSE40160 / GPL570 / 202911\_at

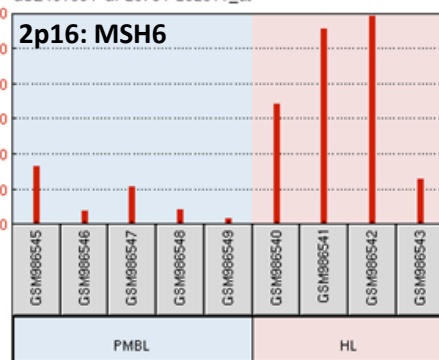

GSE40160 / GPL570 / 203255\_at

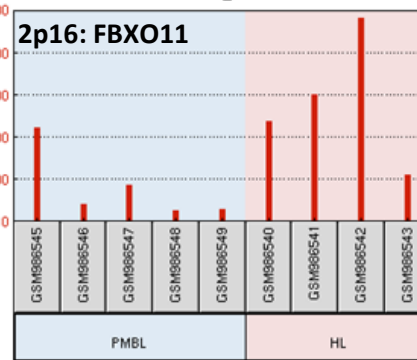

GSE40160 / GPL570 / 226024\_at

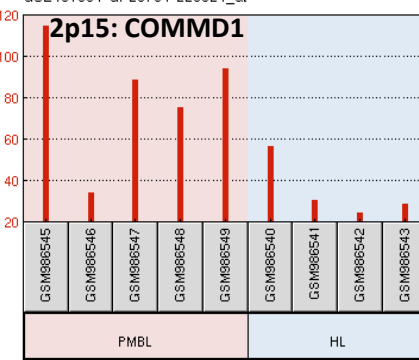

GSE40160 / GPL570 / 206036\_s\_at

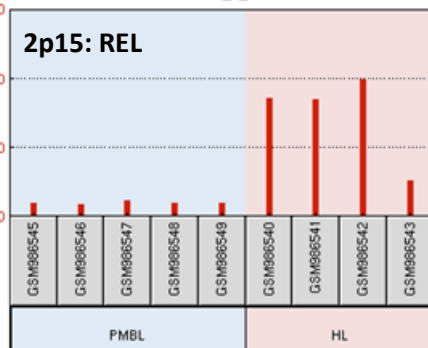

GSE40160 / GPL570 / 203140\_at

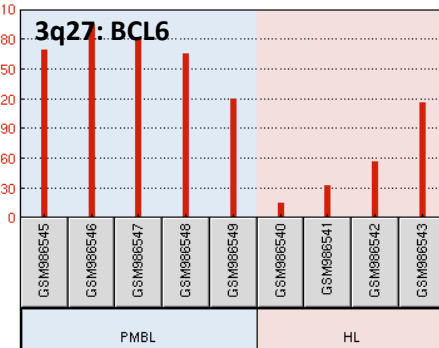

GSE40160 / GPL570 / 224811\_at

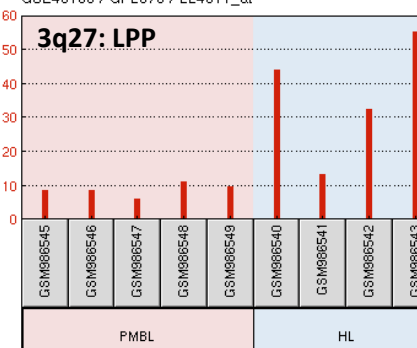

GSE40160 / GPL570 / 202644\_s\_at

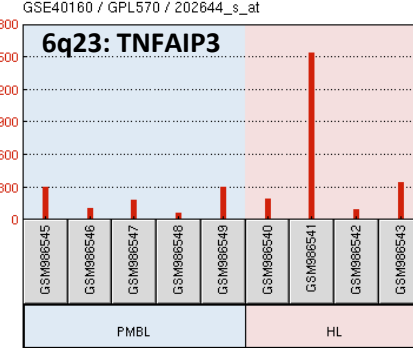

GSE40160 / GPL570 / 209971\_x\_at

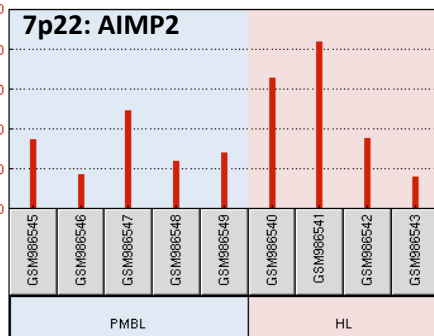

GSE40160 / GPL570 / 217736\_s\_at

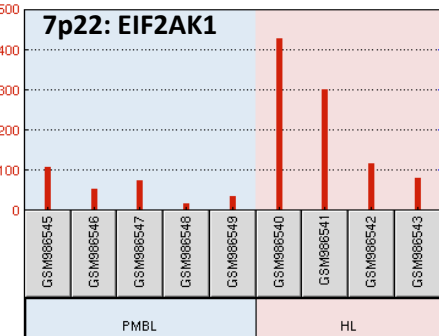

GSE40160 / GPL570 / 218645\_at

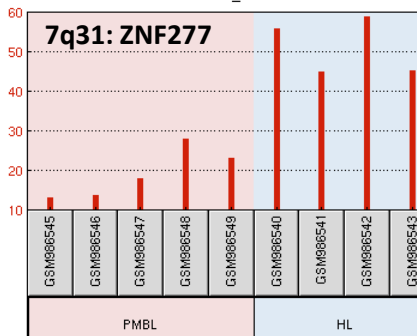

GSE40160 / GPL570 / 227153\_at

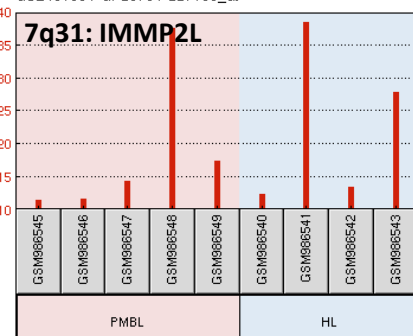

GSE40160 / GPL570 / 216249\_at

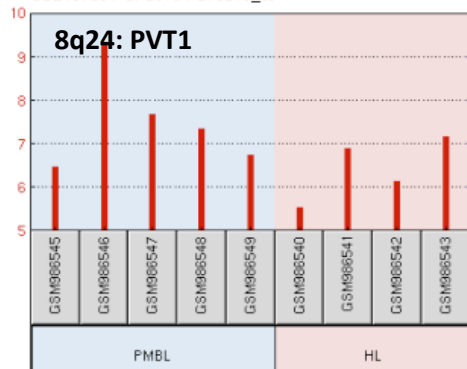

GSE40160 / GPL570 / 205842\_s\_at

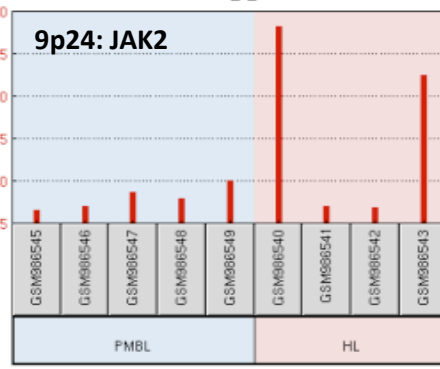

GSE40160 / GPL570 / 227458\_at

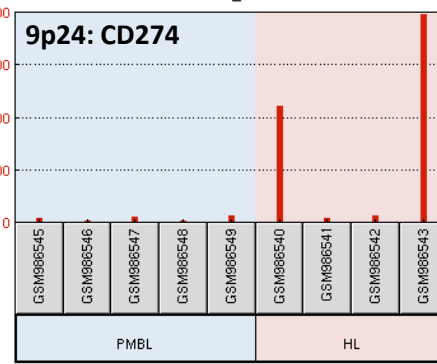

GSE40160 / GPL570 / 220049\_s\_at

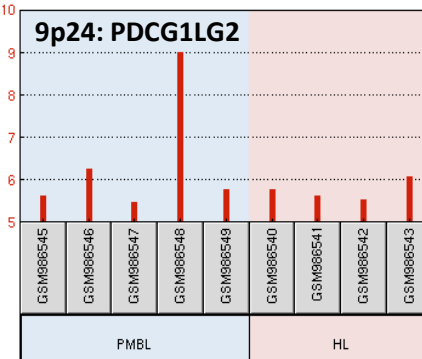

GSE40160 / GPL570 / 226221\_at

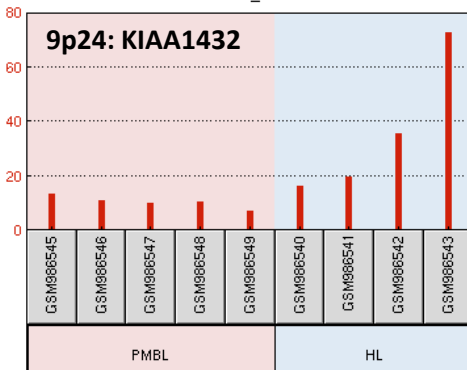

GSE40160 / GPL570 / 207039\_at

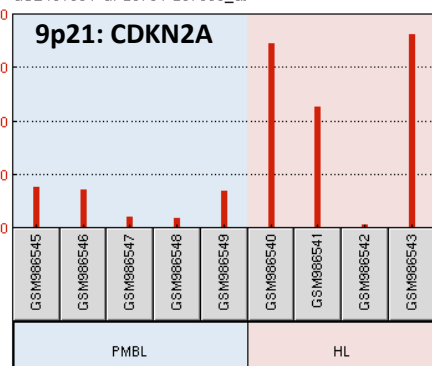

GSE40160 / GPL570 / 207530\_s\_at

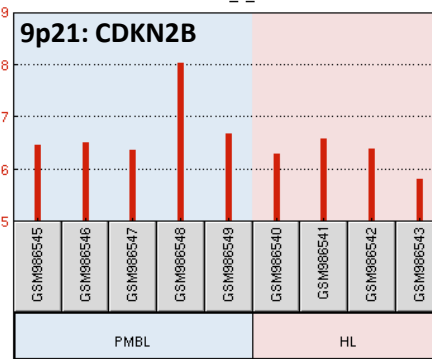

GSE40160 / GPL570 / 204249\_s\_at

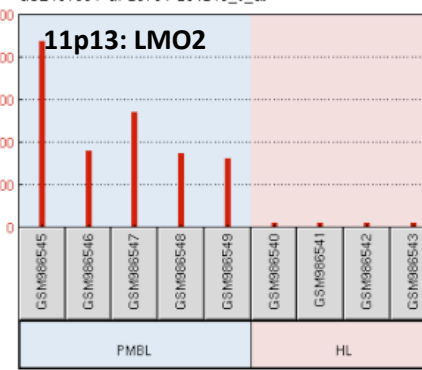

GSE40160 / GPL570 / 223319\_at

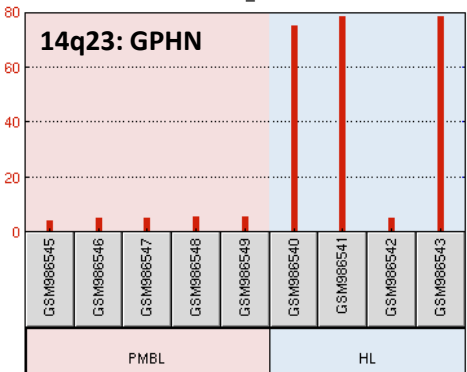

GSE40160 / GPL570 / 226092\_at

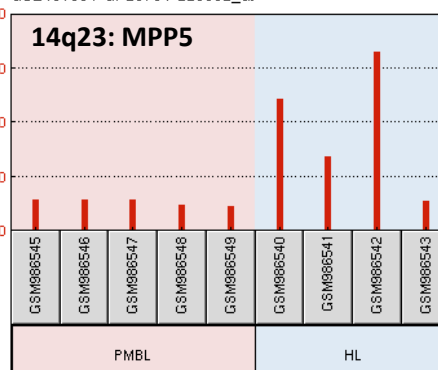

GSE40160 / GPL570 / 201144\_s\_at

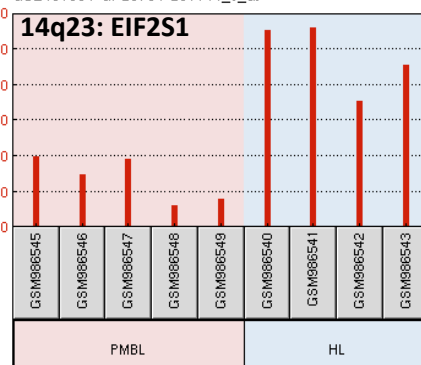

GSE40160 / GPL570 / 227544\_at

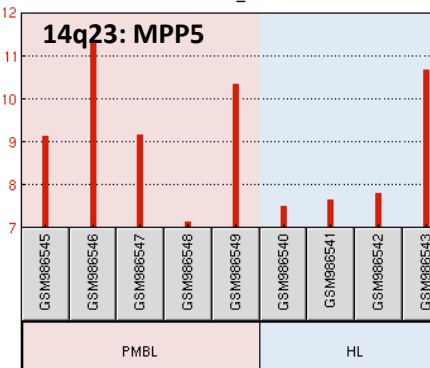

GSE40160 / GPL570 / 210001\_s\_at

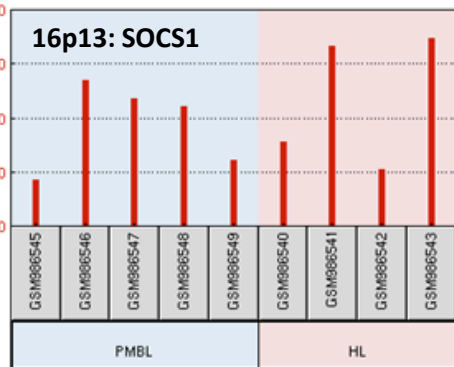

GSE40160 / GPL570 / 226456\_at

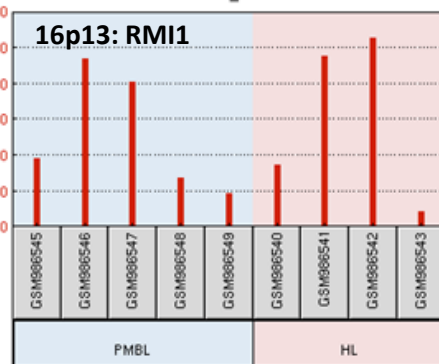

GSE40160 / GPL570 / 200704\_at

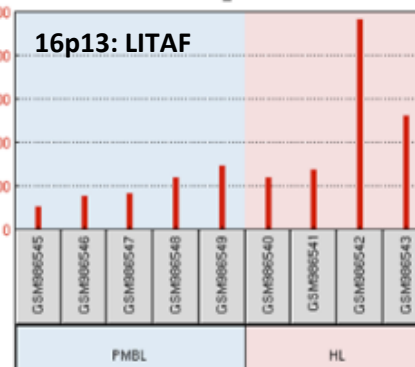

GSE40160 / GPL570 / 238775\_at

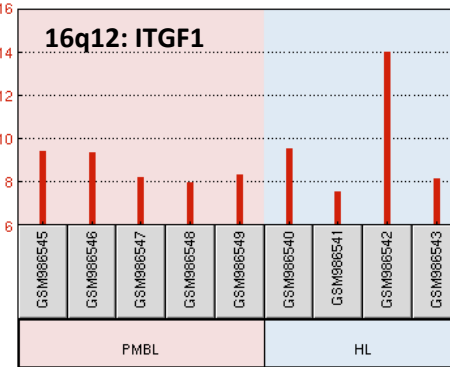

GSE40160 / GPL570 / 202738\_s\_at

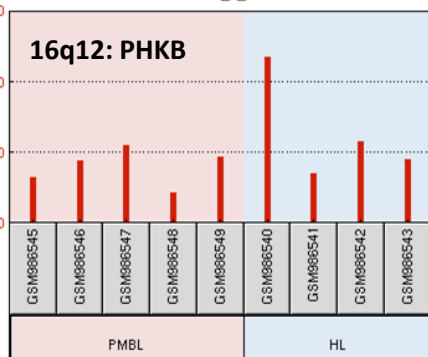

GSE40160 / GPL570 / 1553410\_a\_at

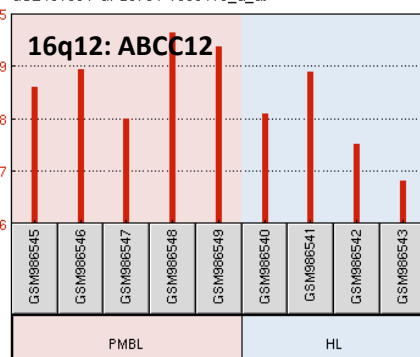

GSE40160 / GPL570 / 1554911\_at

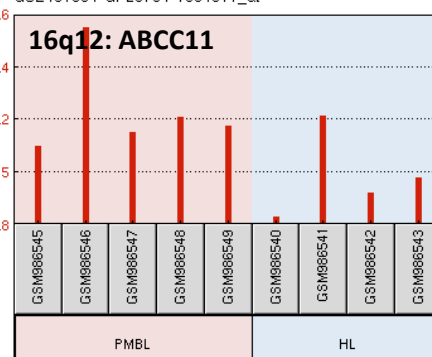

GSE40160 / GPL570 / 223098\_s\_at

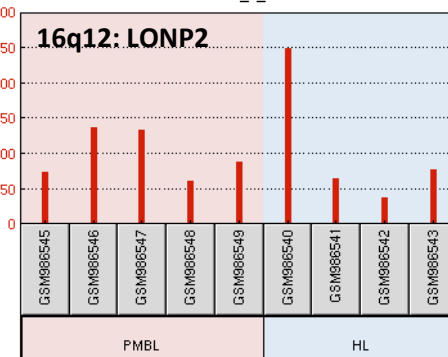

GSE40160 / GPL570 / 219077\_s\_at

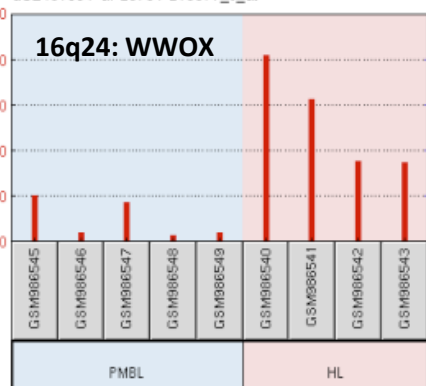

GSE40160 / GPL570 / 212132\_at

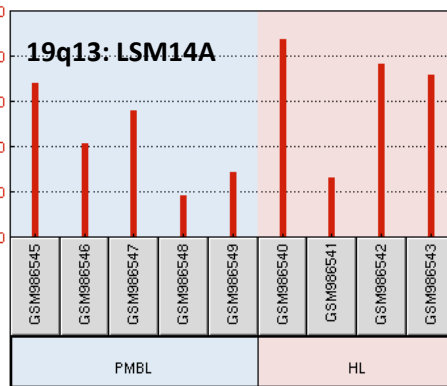

GSE40160 / GPL570 / 203288\_at

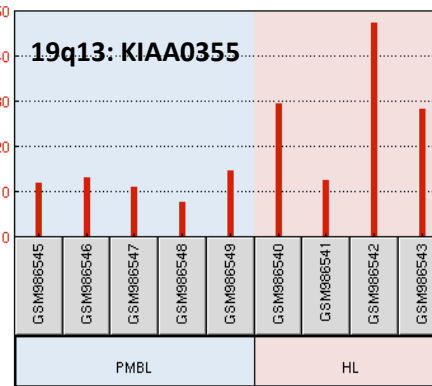

GSE40160 / GPL570 / 208308\_s\_at

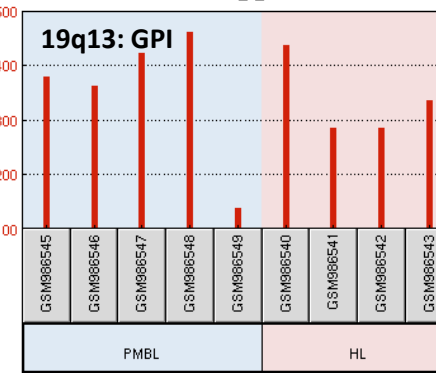

Supplement: pone.0139663.s004.pdf [file pone.0139663.s004.pdf]
